# Supplementary material
Source: PubMed Central journal article supplement (PMC4787843)
Supplement: debs751180.wt6_default.pdf [file debs751180.wt6_default.pdf]

| Paper                                                     | Loss to follow-up                                  | Surveillance for diagnosis of incident events                                                                                                                        | Definition used for outcome events                                                                                    | Information on event subtypes                     | Effect estimate available | Analysis taking into account time to event |
|-----------------------------------------------------------|----------------------------------------------------|----------------------------------------------------------------------------------------------------------------------------------------------------------------------|-----------------------------------------------------------------------------------------------------------------------|---------------------------------------------------|---------------------------|--------------------------------------------|
| Appelros et al., <i>Cerebrovasc Dis</i> 2005              | none reported                                      | medical visit                                                                                                                                                        | WHO criteria                                                                                                          | yes (ischemic stroke, lacunar stroke)             | yes                       | yes                                        |
| Bokura et al., <i>J Stroke Cerebrovasc Dis</i> 2006       | none reported                                      | self-reported questionnaire + telephone                                                                                                                              | not detailed                                                                                                          | yes (ischemic, hemorrhagic stroke)                | yes                       | no                                         |
| Bombois et al., <i>Stroke</i> 2008                        | none reported                                      | medical visit                                                                                                                                                        | DSM-IV, NINCDS-ADRDA, NINDS-AIREN                                                                                     | yes (dementia type)                               | yes                       | yes                                        |
| Buyck et al., <i>Stroke</i> 2009                          | 0.8-4.3%                                           | medical visit + self-reported questionnaire                                                                                                                          | not detailed                                                                                                          | yes (ischemic, hemorrhagic stroke)                | yes                       | yes                                        |
| Debette et al., <i>Stroke</i> 2007                        | none reported                                      | medical visit                                                                                                                                                        | MMSE, DRS (including subscores)                                                                                       | yes (memory, executive function)                  | yes                       | yes                                        |
| Debette et al., <i>Stroke</i> 2010                        | none reported                                      | medical visit + continuous monitoring                                                                                                                                | WHO criteria, DSMIV, NINCDS-ADRDA                                                                                     | yes (ischemic, hemorrhagic stroke; dementia type) | yes                       | yes                                        |
| DeCarli et al., <i>Neurology</i> 2004                     | 0%                                                 | medical visit                                                                                                                                                        | composite memory and executive function scores                                                                        | yes (memory, executive function)                  | yes                       | yes                                        |
| Dufouil et al., <i>Stroke</i> 2009                        | none reported                                      | medical visit                                                                                                                                                        | MMSE, DSM-IV                                                                                                          | no                                                | yes                       | yes                                        |
| Firbank et al., <i>Neurobiol Aging</i> 2007               | 0% (only patients with 2 year assessment included) | medical visit                                                                                                                                                        | DSM-IV, CAMCOG                                                                                                        | no                                                | yes                       | yes                                        |
| Fu et al., <i>J Neurol Neurosurg Psychiatry</i> 2005      | 4.8%                                               | medical visit or telephone                                                                                                                                           | WHO criteria                                                                                                          | yes (ischemic, hemorrhagic stroke)                | yes                       | yes                                        |
| Gerdes et al., <i>Atherosclerosis</i> 2006                | none reported                                      | self-reported questionnaire + telephone                                                                                                                              | Ischemic stroke defined as acute neurologic deficit persisting $\geq$ 1week and hemorrhage ruled out by early CT scan | yes (ischemic stroke only)                        | yes                       | yes                                        |
| Geroldi et al., <i>J Neurol Neurosurg Psychiatry</i> 2006 | none reported                                      | medical visit                                                                                                                                                        | NINCDS-ADRDA                                                                                                          | yes (dementia type)                               | yes                       | no                                         |
| Ikram et al., <i>Neurobiol Aging</i> 2007                 | 1.6%                                               | medical visit + automated linkage of the study database with files from general practitioners, municipality and Regional Institute for Outpatient Mental Health Care | WHO criteria, DSM-III                                                                                                 | yes (cause of death)                              | yes                       | yes                                        |
| Jokinen et al., <i>Cerebrovasc Dis</i> 2009               | 11.4%                                              | medical visit                                                                                                                                                        | DSM-IV, various tests of global cognition, memory, executive function and processing speed                            | yes for cognition                                 | yes                       | no                                         |
| Kantarci et al., <i>Neurology</i> 2009                    | none reported                                      | medical visit                                                                                                                                                        | DSM-III-R                                                                                                             | yes (dementia type)                               | yes                       | yes                                        |
| Kerber et al., <i>J Neurol Sci</i> 2006                   | 5.5%                                               | medical visit, death certificates                                                                                                                                    | death                                                                                                                 | yes (cause of death)                              | yes                       | yes                                        |
| Korf et al., <i>Neurology</i> 2004                        | 7.4%                                               | medical visit                                                                                                                                                        | DSM-IV                                                                                                                | yes (dementia type)                               | yes                       | yes                                        |
| Kramer et al.,                                            | none reported                                      | medical visit                                                                                                                                                        | composite memory and executive function                                                                               | yes (memory, executive function)                  | yes                       | yes                                        |

|                                                          |               |                                                                |                                                                                        |                                                             |     |     |
|----------------------------------------------------------|---------------|----------------------------------------------------------------|----------------------------------------------------------------------------------------|-------------------------------------------------------------|-----|-----|
| <i>Neuropsychology</i> 2007                              |               |                                                                | scores                                                                                 |                                                             |     |     |
| Kuller et al., <i>Neurobiol Aging</i> 2007               | none reported | medical visit, death certificates                              | death                                                                                  | yes (cause of death)                                        | yes | yes |
| Kuller et al., <i>Neuroepidemiology</i> 2003             | none reported | medical visit or self-reported questionnaire + telephone       | not specified                                                                          | yes (dementia type)                                         | yes | yes |
| Kuller et al., <i>Stroke</i> 1998                        | none reported | medical visit                                                  | 3MSE                                                                                   | no                                                          | yes | yes |
| Kuller et al., <i>Stroke</i> 2004                        | none reported | medical visit + surveillance phone call                        | WHO criteria                                                                           | yes (ischemic, hemorrhagic stroke; ischemic stroke subtype) | yes | yes |
| Levy et al., <i>Am J Geriatr Psychiatry</i> 2003         | none reported | medical visit, Social Security death index, obituary newspaper | death                                                                                  | no                                                          | yes | yes |
| Longstreth et al., <i>Stroke</i> 2005                    | none reported | medical visit                                                  | 3MSE                                                                                   | yes (global cognitive, processing speed)                    | yes | yes |
| Meguro et al., <i>J Neurol Sci</i> 2007                  | none reported | medical visit                                                  | DSM-IV, NINCDS-ADRDA, NINDS-AIREN                                                      | yes (dementia type)                                         | yes | no  |
| Mungas et al., <i>Neurology</i> 2002                     | none reported | medical visit                                                  | composite score for global cognition                                                   | no                                                          | yes | yes |
| Mungas et al., <i>Neurology</i> 2005                     | none reported | medical visit                                                  | composite memory and executive function scores                                         | yes (memory, executive function)                            | yes | yes |
| Naka et al., <i>AJNR Am J Neuroradiol</i> 2006           | 1.1%          | no details                                                     | NINDS classification                                                                   | yes (ischemic, hemorrhagic stroke; ischemic stroke subtype) | yes | yes |
| Oksala et al., <i>J Neurol Neurosurg Psychiatry</i> 2009 | 0.5%          | Statistics Finland, death certificates                         | death, ICD9 and ICD10 causes                                                           | yes (cause of death)                                        | yes | yes |
| Prins et al., <i>Arch Neurol</i> 2004                    | none reported | medical visit + continuous monitoring                          | DSM-III-R, NINCDS-ADRDA, NINDS-AIREN                                                   | yes (dementia type)                                         | yes | yes |
| Prins et al., <i>Brain</i> 2005                          | <1%           | medical visit                                                  | various tests of global cognition, memory, executive function and processing speed     | yes (cognitive domains)                                     | yes | yes |
| Schmidt et al., <i>Ann Neurol</i> 2005                   | 4.5%          | medical visit                                                  | composite scores for memory, conceptualization, visuopractical skills, attention/speed | yes (cognitive domains)                                     | yes | yes |
| Silbert et al., <i>Neurology</i> 2009                    | none reported | medical visit                                                  | 2 consecutive semiannual CDR scores $\geq$ 0.5                                         | no                                                          | yes | yes |
| Smith et al., <i>Neurology</i> 2004                      | none reported | telephone interview + review of medical records                | recurrent intracerebral hemorrhage                                                     | yes (intracerebral hemorrhage)                              | yes | yes |
| Smith et al., <i>Arch Neurol</i> 2008                    | none reported | medical visit                                                  | DSM-IV, NINCDS-ADRDA, NINDS-AIREN                                                      | yes (dementia type)                                         | yes | yes |
| Staekenborg et al., <i>Stroke</i> 2009                   | none reported | medical visit                                                  | NINCDS-ADRDA, NINDS-AIREN, Neary and Snowden, McKeith                                  | yes (dementia type)                                         | yes | yes |
| Steffens et al., <i>Am J Geriatr</i>                     | none reported | medical visit                                                  | DSM-IV, NINCDS-ADRDA, NINDS-AIREN                                                      | yes (dementia type)                                         | no  | yes |

|                                                                  |               |                                                                                                                                                          |                                                                |                                    |     |     |
|------------------------------------------------------------------|---------------|----------------------------------------------------------------------------------------------------------------------------------------------------------|----------------------------------------------------------------|------------------------------------|-----|-----|
| <i>Psychiatry</i> 2007                                           |               |                                                                                                                                                          |                                                                |                                    |     |     |
| Steffens et al., <i>Lancet</i> 2000                              | none reported | medical visit                                                                                                                                            | non specified                                                  | no                                 | no  | yes |
| Tapiola et al., <i>Neurobiol Aging</i> 2008                      | none reported | medical visit                                                                                                                                            | DSM-IV, NINCDS-ADRDA                                           | yes (dementia type)                | yes | yes |
| van den Heuvel et al., <i>J Neurol Neurosurg Psychiatry</i> 2006 | none reported | medical visit                                                                                                                                            | tests of memory, executive function and processing speed       | yes (cognitive domains)            | yes | no  |
| van der Flier et al., <i>Int J Geriatr Psychiatry</i> 2005       | 1.3%          | medical visit                                                                                                                                            | CAMCOG                                                         | no                                 | yes | yes |
| van Dijk et al., <i>Stroke</i> 2008                              | <1%           | medical visit                                                                                                                                            | various tests of global cognition, memory and processing speed | yes (cognitive domains)            | yes | no  |
| van Straaten et al., <i>J Neurol</i> 2008                        | none reported | medical visit                                                                                                                                            | NINCDS-ADRDA                                                   | yes (dementia type)                | yes | yes |
| Vermeer et al., <i>Stroke</i> 2003                               | 0%            | medical visit + continuous monitoring                                                                                                                    | WHO criteria                                                   | yes (ischemic, hemorrhagic stroke) | yes | yes |
| Wong et al., <i>Jama</i> 2002                                    | none reported | annual contact with participants and families, survey of discharge lists from local hospitals and death certificates from state vital statistics offices | non specified                                                  | yes (ischemic, hemorrhagic stroke) | yes | yes |
| Yamauchi et al., <i>J Neurol Neurosurg Psychiatry</i> 2002       | none reported | medical visit                                                                                                                                            | non specified                                                  | yes (ischemic, hemorrhagic stroke) | yes | yes |
